# Supplementary material for: Optimization of mesoporous carbon structures for lithium–sulfur battery applications
Source: Royal Society of Chemistry journal article supplement (doi:10.1039/c1jm12979a), 2011-01-01
Supplement: c1jm12979a.pdf [file c1jm12979a.pdf]

## Supporting information

# Optimization of Mesoporous Carbon Structures for Lithium-Sulfur Battery Applications

Xiaolin Li,<sup>\*a</sup> Yuliang Cao,<sup>a, b</sup> Wen Qi,<sup>a, c</sup> Laxmikant V. Saraf,<sup>a</sup> Jie Xiao,<sup>a</sup> Zimin Nie,<sup>a</sup>

Jaroniec Mietek,<sup>d</sup> Ji-Guang Zhang,<sup>a</sup> Birgit Schwenzer,<sup>a</sup> Jun Liu<sup>\*a</sup>

<sup>a</sup> Pacific Northwest National Laboratory, Richland, WA 99352, USA

<sup>b</sup> Department of Chemistry, Wuhan University, Wuhan 430072, P. R. China

<sup>c</sup> School of Material Science and Engineering, Tianjin University, Tianjin, 300072, P. R. China

<sup>d</sup> Department of Chemistry and Biochemistry, Kent State University, Kent, Ohio 44242, USA

Email: [Xiaolin.li@pnl.gov](mailto:Xiaolin.li@pnl.gov), [Jun.Liu@pnl.gov](mailto:Jun.Liu@pnl.gov)

### Supplementary figures.

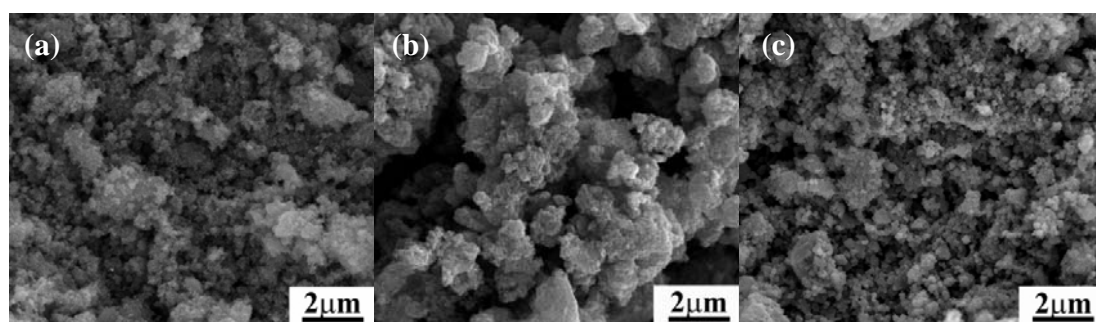

**Fig. S1** SEM images of MC22 and MC22-S composites. (a) As-synthesized MC22; (b) MC22-83 (83 wt.% sulfur loading) after wet impregnation with sulfur-CS<sub>2</sub> solution and 155 °C annealing; (c) MC22-50 (50 wt.% sulfur loading) after wet impregnation with sulfur-CS<sub>2</sub> solution and 155 °C annealing.

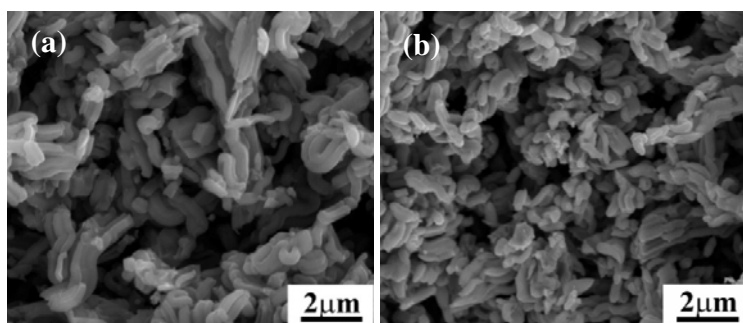

**Fig. S2** SEM images of CMK3 and CMK3-S composites. (a) As-synthesized CMK3; (b) CMK3-56 (56 wt.% sulfur loading) after wet impregnation with sulfur-CS<sub>2</sub> solution and 155 °C annealing.

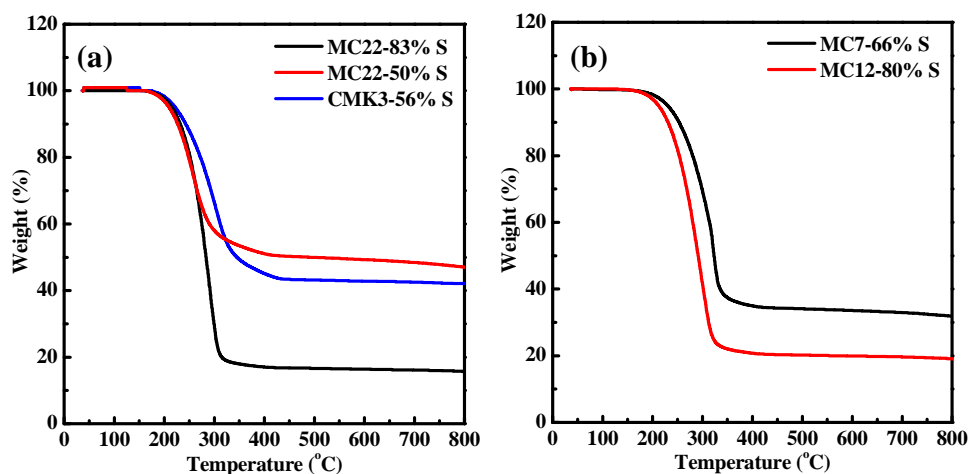

**Fig. S3** TGA curves of MCS composites recorded under nitrogen with a heating rate of 10 °C/min.

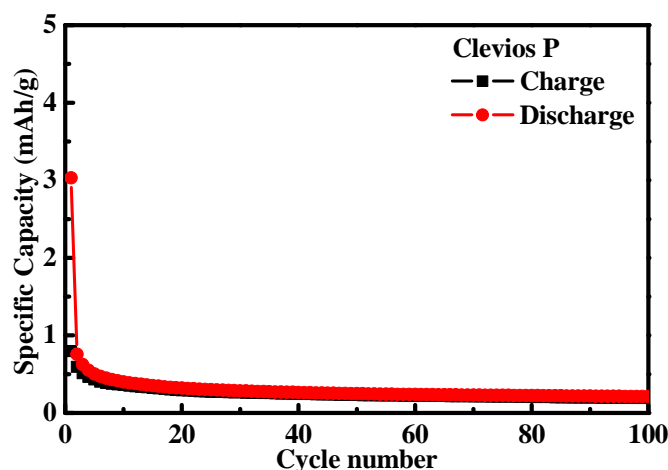

**Fig. S4** Cycling data of a Clevios P electrode between 1.0 V - 3.0 V at a charge/discharge current density of 5 mA/g. The electrode was made by pasting the slurry that mixed 90 wt.% Clevios P with 10 wt.% carbon black on an Al foil. Electrochemical tests were performed using coin cells with Clevios P cathode and lithium metal as the counter and reference electrode. The electrolyte was 1 M LiTFSI in DOL and DME (1:1 by volume). A microporous membrane (Celgard 2400) was used as the separator. The galvanostatic charge-discharge test was conducted at a voltage interval of 1.0 V - 3.0 V using a BT-2043 Arbin Battery Testing System. Clevios P itself has almost no capacity between 1.0 V to 3.0 V.

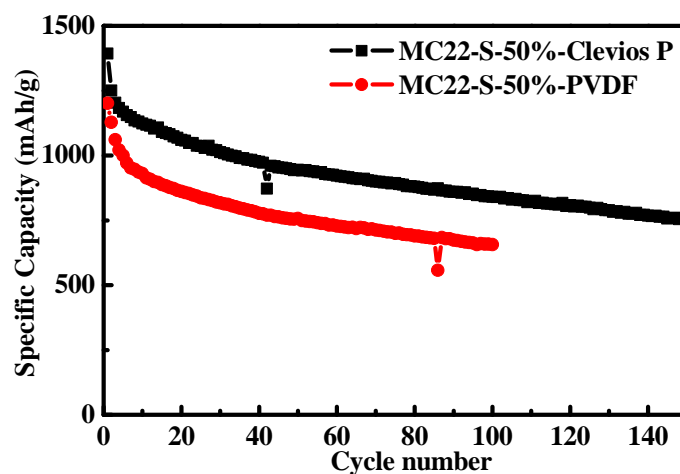

**Fig. S5** Long term cycle stability of MC22-50 composite electrodes using Clevios P and PVDF, respectively, as binders.

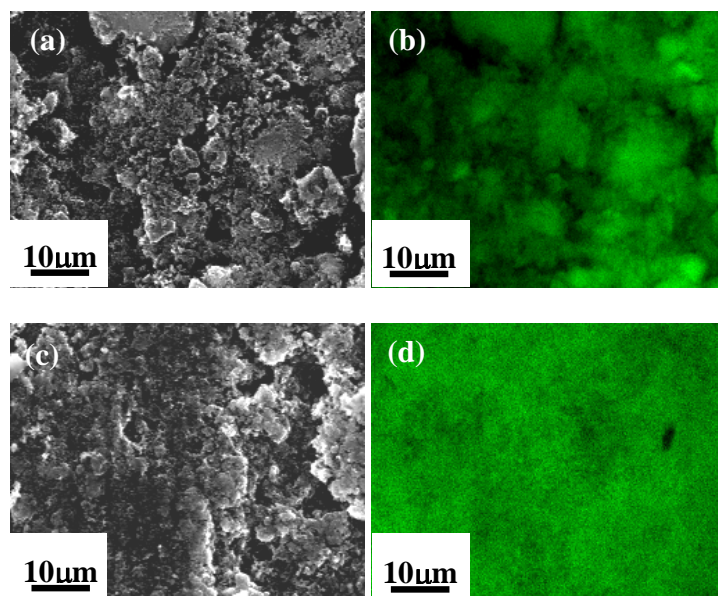

**Fig. S6** SEM images and S elemental mapping results of the MC22-50-Clevios P electrode before and after cycling. (a) SEM image of the MC22-50-Clevios P electrode before cycling. (b) S elemental mapping of the MC22-50-Clevios P electrode before cycling. (c) SEM image of the MC22-50-Clevios P electrode after 100 cycles. (d) S elemental mapping of the MC22-50-Clevios P electrode after 100 cycles.

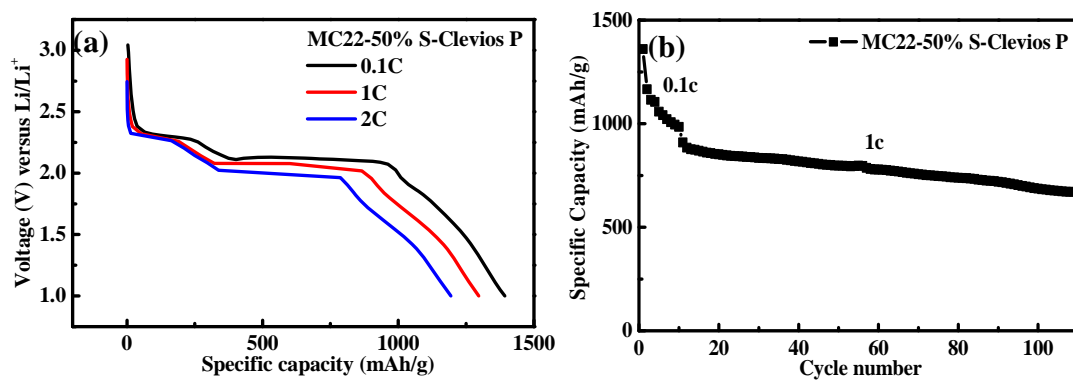

**Fig. S7** Rate performance of MC22-50-Clevios P electrodes. a) First cycle discharge curves of MC22-50-Clevios P electrodes at different current densities of 168 mA/g (0.1C), 1680 mA/g (1C), and 3340 mA/g (2C) respectively. b) Long term cycling of a MC22-50-Clevios P electrode after a 110 cycle test under different charge-discharge current densities of 168 mA/g (0.1C) and 1680 mA/g (1C) respectively.
